# Supplementary material for: Degradation of metribuzin in the UV/chlorine process: kinetic model, degradation by-products and transformation pathways
Source: Royal Society of Chemistry journal article supplement (doi:10.1039/d3ew00007a), 2023-01-01
Supplement: d3ew00007a1.pdf [file d3ew00007a1.pdf]

## Supplementary Material

### **Degradation of metribuzin in the UV/chlorine process: Kinetic model, degradation by-products and transformation pathways**

Chen-Yan Hu<sup>a,c</sup>, Dan-Dan Huang<sup>a</sup>, Yi-Li Lin<sup>b\*</sup>, Qiang-Bing Wang<sup>a</sup>, Ling Xu<sup>a</sup>, Zi-Yi Dong<sup>a</sup>, Yi-Hui Wu<sup>a</sup> and Sheng-Jie Ji<sup>a</sup>

<sup>a</sup> *College of Environmental and Chemical Engineering, Shanghai Engineering Research Center of Energy-Saving in Heat Exchange Systems, Shanghai University of Electric Power, Shanghai 200090, PR China*

<sup>b</sup> *Department of Safety, Health and Environmental Engineering, National Kaohsiung University of Science and Technology, Kaohsiung 824, Taiwan, ROC*

<sup>c</sup> *Shanghai Institute of Pollution Control and Ecological Security, Shanghai 200092, PR China*

\*Corresponding author: Yi-Li Lin

E-mail: [yililin@nkust.edu.tw](mailto:yililin@nkust.edu.tw)

Phone: +886-7-6011000#32328

Fax: +886-7-6011061

Address: No. 1, University Rd., Yanchao Dist., Kaohsiung City 824, Taiwan.

Total number of pages: 6

Total number of Figures: 1

Total number of Tables: 1

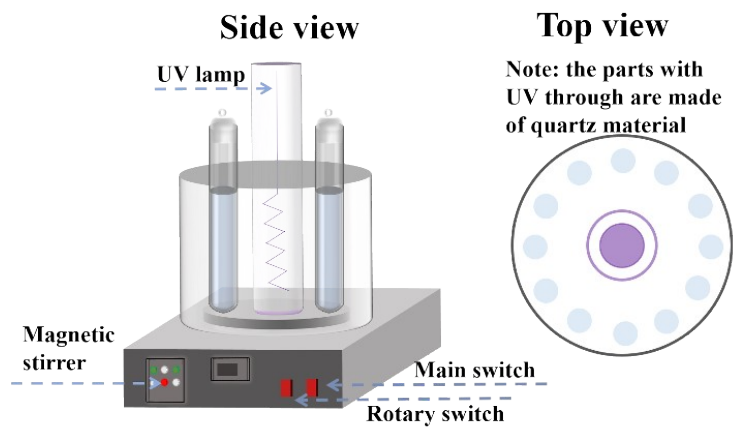

**Fig. S1.** Schematic diagram of UV reactor.

**Table S1.** Structure of intermediate.

| Number | m/z | Structure                                                                            | Reference |
|--------|-----|--------------------------------------------------------------------------------------|-----------|
| M1     | 168 | 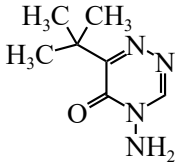    | [1,14,55] |
| M2     | 184 |     | [1,14,55] |
| M3     | 153 |     | [1,14,55] |
| M4     | 169 |    | [1,14,55] |
| M5     | 199 |  | [1,14,55] |
| M6     | 215 |  | [2,14,55] |
| M7     | 186 |  | [14]      |
| M8     | 170 |  | [14]      |
| M9     | 215 |  | [14]      |

| Number | m/z | Structure | Reference |
|--------|-----|-----------|-----------|
| M10    | 212 |           | [14]      |
| M11    | 196 |           | [14]      |
| M12    | 157 |           | [14]      |
| M13    | 143 |           | [14]      |
| M14    | 188 |           | [2]       |
| M15    | 231 |           | [2,64]    |
| M16    | 231 |           | [2]       |
| M17    | 233 |           | [2]       |
| M18    | 248 |           | [64]      |

| Number | m/z | Structure                                                                            | Reference |
|--------|-----|--------------------------------------------------------------------------------------|-----------|
| M19    | 170 | 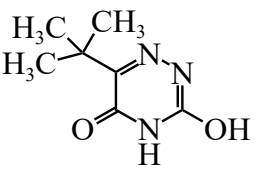   | [64]      |
| M20    | 130 |     | [64]      |
| M21    | 114 |     | [64]      |
| M22    | 246 |    | [2]       |
| M23    | 248 |   | [2]       |
| M24    | 248 |  | [2]       |
| M25    | 202 |  | [2]       |
| M26    | 200 |  | [2]       |
| M27    | 185 |  | [2]       |

| Number | m/z | Structure                                                                          | Reference |
|--------|-----|------------------------------------------------------------------------------------|-----------|
| M28    | 201 | 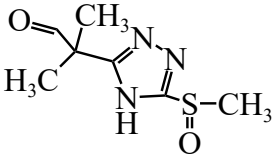 | [2]       |
| M29    | 246 |  | [14]      |
